# Supplementary material
Source: Springer Nature journal article supplement (https://www.springermedizin.de/resource/supplementary/12871_2013_210_MOESM1_ESM.pdf/9429152)
Supplement: MOESM1 [file 9429152]

## Electronic supplementary materials

### Measurement of endotracheal tube secretions volume by micro computed tomography (MicroCT) scan: an experimental and clinical study.

Andrea Coppadoro<sup>1</sup>; Giacomo Bellani<sup>1,2</sup>; Alfio Bronco<sup>1</sup>; Roberto Borsa<sup>1</sup>; Alberto Lucchini<sup>2</sup>; Simone Bramati<sup>3</sup>; Leonello Avalli<sup>2</sup>; Roberto Marcolin<sup>2</sup>; Antonio Pesenti<sup>1,2</sup>

[1] Department of Health Sciences, University of Milan-Bicocca, Monza, Italy

[2] Department of Anesthesia and Intensive Care, San Gerardo Hospital, Monza, Italy

[3] Department of Clinical Pathology, Unit of Microbiology, San Gerardo Hospital, Monza, Italy

#### Methods

The same five gel aliquots were used to assess airway resistances to airflow in a 7.5 mm ETT. We connected flow and pressure transducers to an acquisition system (Respironics CO2SMO plus!, Philips Healthcare, Andover, MA) calculating airway resistances at 30, 45 and 60 L/min of airflow by measurement of pressure drop across the ETTs. Three measurements were obtained for each combination of flow and gel aliquots.

#### Results

We then evaluated the impact of our model of secretions on resistance to airflow in a 7.5mm ETT, resembling quiet assisted breathing (30 L/min), controlled mechanical ventilation (45 L/min) and increased respiratory effort during assisted breathing (60 L/min). As expected, resistances increased by increasing the amount of injected gel and airflow ( $p < 0.001$  for both, Figure E1). The resistance increase was more pronounced at higher airflows ( $p < 0.001$  for interaction), i.e. doubled at 30 L/min and increased almost three times at 60 L/min of airflow after injection of 1 ml of gel.
